# Supplementary material for: cAMP Is a Promising Regulatory Molecule for Plant Adaptation to Heat Stress
Source: MDPI journal article supplement (doi:10.3390/life12060885), 2022-06-14
Supplement: s1 [file s1]

**Table S1. cAMP-mediated biological processes under heat stress**

| Biological Processes                                       | References |
|------------------------------------------------------------|------------|
| Cellular calcium ion homeostasis                           | [1–4]      |
| Chaperone-mediated protein folding                         | [1–4]      |
| Chloroplasts-associated                                    | [2–4]      |
| Cytoskeleton organization                                  | [1–4]      |
| Defense response, incompatible interaction                 | [2–4]      |
| Detection of biotic stimulus                               | [1–4]      |
| Hydrogen peroxide metabolic process                        | [1–4]      |
| Ion transport and cell signaling                           | [1–4]      |
| Lipid oxidation                                            | [2–4]      |
| Macromolecular complex assembly                            | [2–4]      |
| Macromolecule metabolic process                            | [2–4]      |
| Malate metabolic process                                   | [2–4]      |
| Membrane fusion                                            | [2–4]      |
| Mitochondria-associated                                    | [2–4]      |
| mRNA metabolic process                                     | [2–4]      |
| Phytohormone biosynthesis and homeostasis                  | [2–4]      |
| Proteasomal degradation                                    | [2–4]      |
| Protein metabolic process                                  | [2–4]      |
| Protein phosphorylation                                    | [2–4]      |
| Regulation of cell death                                   | [2–4]      |
| Response to hormone (abscisic acid, auxin, salicylic acid) | [2–4]      |
| Small GTPase mediated signal transduction                  | [2–4]      |
| Transcription and translation                              | [2–4]      |
| Vacuolar transport                                         | [2–4]      |

## References

1. Gao, F.; Han, X.; Wu, J.; Zheng, S.; Shang, Z.; Sun, D.; Zhou, R.; Li, B. A heat-activated calcium-permeable channel—Arabidopsis cyclic nucleotide-gated ion channel 6—is involved in heat shock responses. *Plant J.* **2012**, *70*, 1056–1069.
2. Paradiso, A.; Domingo, G.; Blanco, E.; Buscaglia, A.; Fortunato, S.; Marsoni, M.; Scarcia, P.; Caretto, S.; Vannini, C.; de Pinto, M.C. Cyclic AMP mediates heat stress response by the control of redox homeostasis and ubiquitin-proteasome system. *Plant Cell Environ.* **2020**, *43*, 2727–2742.
3. Yang, H.; Zhao, Y.; Chen, N.; Liu, Y.; Yang, S.; Du, H.; Wang, W.; Wu, J.; Tai, F.; Chen, F.; et al. A new adenylyl cyclase, putative disease resistance RPP13-like protein 3, participates in abscisic acid-mediated heat stress resistance in maize. *J. Exp. Bot.* **2021**, *72*, 283–301.
4. Zhao, Y.L.; Du, H.W.; Wang, Y.K.; Wang, H.L.; Yang, S.Y.; Li, C.H.; Chen, N.; Yang, H.; Zhang, Y.H.; Zhu, Y.L.; et al. The calcium-dependent protein kinase ZmCDPK7 functions in heat-stress tolerance in maize. *J. Integr. Plant Biol.* **2021**, *63*, 510–527.
