# Supplementary material for: cAMP Is a Promising Regulatory Molecule for Plant Adaptation to Heat Stress
Source: MDPI journal article supplement (doi:10.3390/life12060885), 2022-06-14
Supplement: s1 [file s1]

Figure.S1 Sequence alignment of the adenylyl cyclases (ACs) identified in plants. Blue and red indicates 70-90% and 50-70% sequence similarity among the elven identified ACs in plants, respectively.
